# Supplementary material for: Spiropyran-incorporated honeycomb porous films with reversible multistimuli-responsive properties
Source: Royal Society of Chemistry journal article supplement (doi:10.1039/d2tc00749e), 2022-01-01
Supplement: d2tc00749e1.pdf [file d2tc00749e1.pdf]

## Supporting Information

### **Spiropyran-incorporated honeycomb porous film with reversible multistimuli-responsive properties**

Junwen Xie,<sup>†a</sup> Junming Zhang,<sup>†a</sup> Yuhang Han,<sup>a</sup> Yingyi Ma,<sup>\*a</sup> Jingfang Li,<sup>\*b</sup> Min Zhu<sup>c</sup>

<sup>a</sup>School of Material Science and Chemical Engineering, Harbin University of Science and Technology, Harbin 150040, China;

<sup>b</sup>Key Laboratory of Functional Inorganic Material Chemistry (MOE), School of Chemistry and Materials Science, Heilongjiang University, Harbin 150080, China;

<sup>c</sup>School of Electrical Engineering and Automation, Harbin Institute of Technology, Harbin 150001, China

To whom corresponding should be addressed. Email: [mayingyi@hrbust.edu.cn](mailto:mayingyi@hrbust.edu.cn).

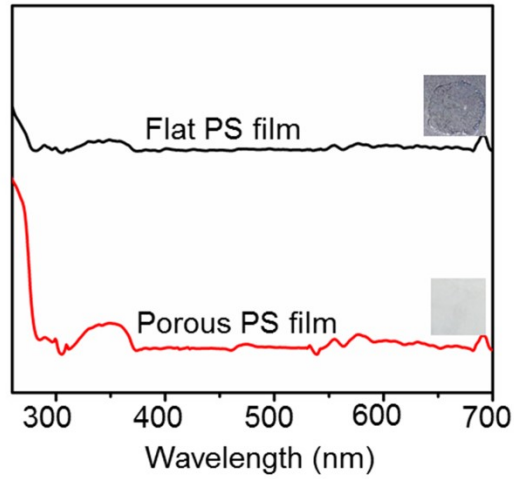

**Figure S1.** UV-vis absorption spectra of flat and porous PS films (insets: the photos of flat (transparent) and porous (white) PS film).

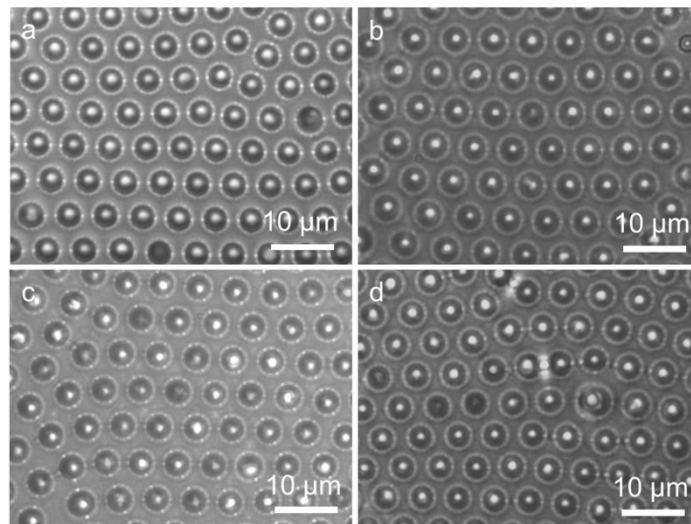

**Figure S2.** The optical images of SP-doped porous film (a) after UV irradiation (b), heat treatment (c) and acid vapor treatment (d).

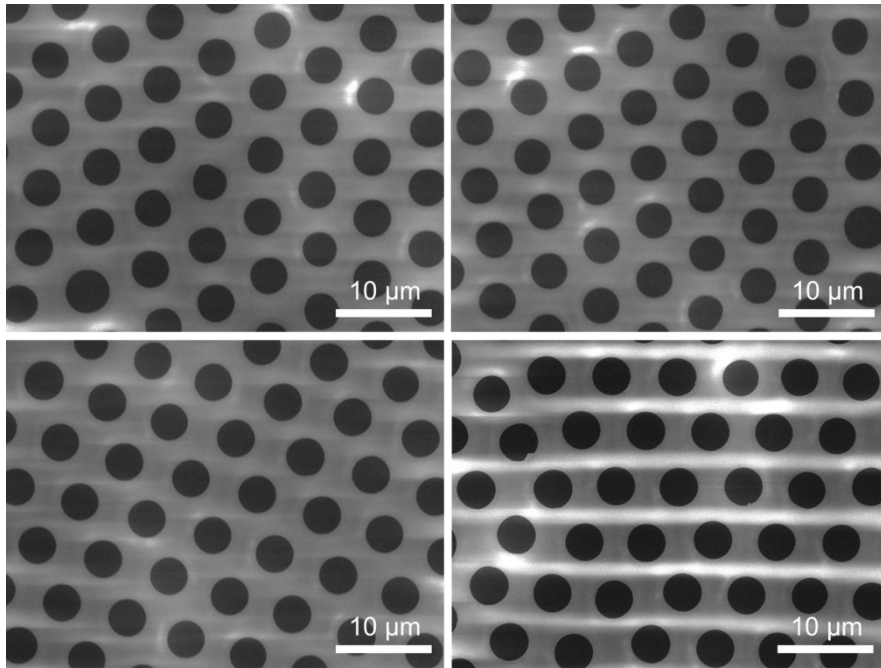

**Figure S3.** SEM images of SP-doped porous film (a) after UV irradiation (b), heat treatment (c) and acid vapor treatment (d).
